# Supplementary material for: Metformin Affects Cardiac Arachidonic Acid Metabolism and Cardiac Lipid Metabolite Storage in a Prediabetic Rat Model
Source: MDPI journal article supplement (doi:10.3390/ijms22147680), 2021-07-19
Supplement: s1 [file s1]

**SUPPLEMENTARY TABLE 1 – Serum parameters**

|                               | W                | HHTg            | P      |
|-------------------------------|------------------|-----------------|--------|
| Body weight (g)               | 428.13 ± 11.51   | 410.63 ± 9.17   | n.s.   |
| ETT weight (g/100g b.w.)      | 1.235 ± 0.034    | 1.839 ± 0.038   | <0.001 |
| Non-fasting glucose (mmol/l)  | 6.563 ± 0.191    | 8.638 ± 0.181   | <0.001 |
| AUC <sub>0-180</sub> (mmol/l) | 1268 ± 22        | 1476 ± 18       | <0.001 |
| HOMA-IR                       | 2.095 ± 0.083    | 2.667 ± 0.110   | <0.01  |
| Insulin (nmol/l)              | 0.279 ± 0.022    | 0.273 ± 0.028   | n.s.   |
| Glucagon (pg/ml)              | 224.61 ± 14.82   | 191.22 ± 13.38  | n.s.   |
| Serum TG (mmol/l)             | 1.559 ± 0.108    | 3.446 ± 0.256   | <0.001 |
| Serum cholesterol (mmol/l)    | 1.506 ± 0.067    | 1.773 ± 0.034   | <0.01  |
| HDL-C (mmol/l)                | 1.265 ± 0.082    | 0.883 ± 0.030   | <0.01  |
| NEFA (mmol/l)                 | 0.496 ± 0.020    | 0.713 ± 0.015   | <0.001 |
| TNFα (pg/ml)                  | 4.289 ± 0.301    | 13.337 ± 0.921  | <0.001 |
| MCP-1 (ng/ml)                 | 4.794 ± 0.242    | 10.552 ± 1.492  | <0.01  |
| IL-6 (pg/ml)                  | 126.501 ± 12.453 | 171.047 ± 8.329 | <0.05  |
| Leptin (ng/ml)                | 5.513 ± 0.635    | 7.510 ± 0.217   | <0.05  |
| HMW Adiponectin (μg/ml)       | 1.015 ± 0.034    | 0.893 ± 0.030   | <0.05  |

**SUPPLEMENTARY TABLE 2 – Parameters of lipid metabolism in the myocardium**

|                                    | W               | HHTg             | P      |
|------------------------------------|-----------------|------------------|--------|
| TG in heart (μmol/g)               | 1.357 ± 0.099   | 1.726 ± 0.112    | <0.05  |
| DAG in heart (μmol/g)              | 0.372 ± 0.015   | 0.671 ± 0.061    | <0.01  |
| CE in heart (μmol/g)               | 0.397 ± 0.025   | 0.555 ± 0.045    | <0.05  |
| Lysophosphatidylcholine (μmol/g)   | 1.617 ± 0.041   | 2.341 ± 0.115    | <0.001 |
| 14,15 – EET (ng/mg prot.)          | 4.623 ± 0.185   | 3.696 ± 0.366    | <0.05  |
| 20 – HETE (ng/mg prot.)            | 147.433 ± 4.075 | 188.709 ± 14.092 | <0.05  |
| Glucose oxidation (nmol/g/g/2h)    | 203.59 ± 4.73   | 176.19 ± 9.15    | <0.05  |
| Fatty acid oxidation (nmol/g/g/2h) | 1169.72 ± 45.56 | 1351.73 ± 35.73  | <0.01  |
| FADS1 (2 <sup>-ΔΔCt</sup> )        | 1.000 ± 0.053   | 0.954 ± 0.047    | n.s.   |
| FADS2 (2 <sup>-ΔΔCt</sup> )        | 1.000 ± 0.033   | 1.202 ± 0.071    | <0.05  |
| SCD1 (2 <sup>-ΔΔCt</sup> )         | 1.000 ± 0.045   | 1.250 ± 0.053    | <0.01  |
| SCD4 (2 <sup>-ΔΔCt</sup> )         | 1.000 ± 0.051   | 1.068 ± 0.049    | n.s.   |
| CYP2c6 (2 <sup>-ΔΔCt</sup> )       | 1.000 ± 0.050   | 1.305 ± 0.067    | <0.05  |
| CYP2c11 (2 <sup>-ΔΔCt</sup> )      | 1.000 ± 0.037   | 0.696 ± 0.043    | <0.01  |
| D5D index (PL)                     | 1.000 ± 0.114   | 0.447 ± 0.021    | <0.001 |
| D6D index (PL)                     | 1.000 ± 0.078   | 1.276 ± 0.047    | <0.001 |
| D9D index (PL)                     | 1.000 ± 0.204   | 1.754 ± 0.138    | <0.001 |
| D5D index (CE)                     | 1.000 ± 0.181   | 0.405 ± 0.043    | <0.001 |
| D6D index (CE)                     | 1.000 ± 0.261   | 1.507 ± 0.058    | <0.001 |
| D9D index (CE)                     | 1.000 ± 0.124   | 1.198 ± 0.049    | <0.01  |

**SUPPLEMENTARY TABLE 3** – Fatty acid profile in cardiac phospholipids

|                               | W              | HHTg           | P      |
|-------------------------------|----------------|----------------|--------|
| Palmitic acid (mol %)         | 15.088 ± 0.231 | 17.050 ± 0.287 | <0.001 |
| Palmitoleic acid (mol %)      | 0.209 ± 0.018  | 0.420 ± 0.036  | <0.001 |
| Stearic acid (mol %)          | 25.321 ± 0.826 | 27.545 ± 0.233 | <0.05  |
| Oleic acid (mol %)            | 2.794 ± 0.149  | 3.524 ± 0.153  | <0.01  |
| Vaccenic acid (mol %)         | 4.633 ± 0.214  | 4.436 ± 0.116  | n.s.   |
| Linoleic acid (mol %)         | 23.628 ± 0.394 | 25.915 ± 0.358 | <0.001 |
| Arachidonic acid (mol %)      | 24.882 ± 0.307 | 18.250 ± 0.372 | <0.001 |
| Eicosapentaenoic acid (mol %) | 0.064 ± 0.003  | 0.025 ± 0.001  | <0.001 |
| Docosahexaenoic acid (mol %)  | 2.534 ± 0.165  | 2.835 ± 0.062  | n.s.   |

**SUPPLEMENTARY TABLE 4** – Fatty acid profile in cardiac cholesteryl esters

|                               | W              | HHTg           | P      |
|-------------------------------|----------------|----------------|--------|
| Palmitic acid (mol %)         | 34.264 ± 0.366 | 33.476 ± 0.718 | n.s.   |
| Palmitoleic acid (mol %)      | 0.891 ± 0.116  | 0.722 ± 0.046  | n.s.   |
| Stearic acid (mol %)          | 11.625 ± 0.529 | 12.653 ± 0.143 | n.s.   |
| Oleic acid (mol %)            | 11.681 ± 0.921 | 14.068 ± 0.552 | <0.05  |
| Vaccenic acid (mol %)         | 2.188 ± 0.161  | 1.839 ± 0.142  | n.s.   |
| Linoleic acid (mol %)         | 21.110 ± 0.551 | 17.302 ± 0.583 | <0.001 |
| Arachidonic acid (mol %)      | 15.689 ± 0.326 | 17.395 ± 0.204 | <0.001 |
| Eicosapentaenoic acid (mol %) | 0.359 ± 0.063  | 0.559 ± 0.066  | <0.05  |
| Docosahexaenoic acid (mol %)  | 2.194 ± 0.127  | 1.986 ± 0.156  | n.s.   |
